# 1 Staphylococcal superantigen-like protein 13 activates neutrophils via 2 Formyl Peptide Receptor 2

3 Yuxi Zhao, Kok P. M. van Kessel, Carla J. C. de Haas, Malbert R. C. Rogers, Jos A. G. van  
4 Strijp, Pieter-Jan A. Haas

5 Department of Medical Microbiology, University Medical Center Utrecht, Utrecht University, Utrecht, The Netherlands

6 Email address: [P.J.A.Haas@umcutrecht.nl](mailto:P.J.A.Haas@umcutrecht.nl)

## 7 **Abstract**

8 Staphylococcal Superantigen-Like (SSL) proteins, one of major virulence factor  
9 families produced by *Staphylococcus aureus*, were previously demonstrated to be immune  
10 evasion molecules that interfere with a variety of innate immune defenses. However, in  
11 contrast to these characterized SSLs, that inhibit immune functions, we show that SSL13 is a  
12 strong activator of neutrophils via the formyl-peptide receptor 2 (FPR2). Moreover, our data  
13 show that SSL13 acts as a chemoattractant, induces degranulation and oxidative burst in  
14 neutrophils. As with many other staphylococcal immune evasion proteins, SSL13 shows a  
15 high degree of human specificity. SSL13 is not able to efficiently activate mouse neutrophils,  
16 hampering *in vivo* experiments.

17 In conclusion, SSL13 is a neutrophil chemoattractant and activator that acts via the  
18 FPR2. Therefore, SSL13 is a unique SSL member that does not belong to the immune  
19 evasion class, but is a pathogen alarming molecule.

## 20 **Importance**

21 This study describes the target receptor and mechanism of action of Staphylococcal  
22 superantigen like 13 (SSL13), a secreted protein residing on *S. aureus* immune evasion

23 cluster 2(IEC-2). In sharp contrast to other previously characterized SSLs located on the  
24 staphylococcal pathogenicity island 2 (SPI-2) , that inhibit immune functions, we  
25 demonstrate that SSL13 is a chemoattractant and a neutrophil activator that acts via the  
26 FPR2. Therefore, SSL13 is a unique SSL member not belonging to the immune evasion  
27 class, but is a pathogen alarming molecule sensed by the FPR2. Our study provides a new  
28 concept of SSLs; SSLs not only inhibit host immune processes but also recruit human  
29 neutrophils to the site of infection. This new insight allows us to better understand complex  
30 interactions between host and *S. aureus* pathological processes.

31 **Keywords:** *Staphylococcus aureus*, phage display, SSL13, activation, formyl-peptide  
32 receptor 2

### 33 **Introduction**

34 The Gram-positive bacterium *Staphylococcus aureus* (*S. aureus*) is an opportunistic  
35 human pathogen that causes a wide range of diseases from mild skin infections to more  
36 serious life-threatening wound and systemic infections (1). In order to successfully  
37 invade and colonize the human host, *S. aureus* secretes a large arsenal of immune evasion  
38 molecules that specifically target components of the human innate and adaptive immune  
39 systems (2). These secreted proteins interfere with a range of immune defenses, which  
40 can be grouped into four categories: blocking, degradation, cell lysis and modulation (3).  
41 Despite the functional differences and diversity in targets, the staphylococcal immune  
42 evasion proteins are secreted proteins that show remarkable resemblances. These proteins  
43 contain very conserved structural properties (4). They are often small, varying in size  
44 between 8 and 35-kDa and have extreme isoelectric points (above 9 or below 5). Another

45 common property of these proteins is that they are located on genomic clusters with other  
46 virulence factors. The secretome of *S. aureus* is predicted to contain up to 270 proteins,  
47 of which over 35 staphylococcal evasion molecules have been described (3).  
48 Identification and characterization of these secreted proteins will lead to a better  
49 understanding of the *S. aureus* pathological processes.

50 Neutrophils play a crucial role in protecting the host from *S. aureus* infections (5).  
51 Inherited or acquired neutrophil dysfunction, such as leukocyte adhesion deficiency and  
52 chronic granulomatous disease, lead to an increased risk of severe *S. aureus* infections (6).  
53 Disruption of physical barriers and invasion of *S. aureus* initiates the release of pro-  
54 inflammatory signals that promote neutrophil adherence to the vascular endothelium,  
55 extravasation and migration from the bloodstream towards to the site of infection (1).  
56 However, *S. aureus* can subvert neutrophil functions via the secretion of proteins that  
57 inhibit neutrophil recruitment and activation (7, 8). A variety of immune evasion proteins  
58 have been identified that specifically target neutrophil surface receptors. Some immune  
59 evasion proteins inhibit pro-inflammatory receptors such as Chemotaxis Inhibitory  
60 Protein of *S. aureus* (CHIPS) (9), Formyl Peptide receptor-like 1 inhibitory protein  
61 (FLIPr), and the FLIPr homologue FLIPr-like (FLIPrL)(10, 11). Other immune evasion  
62 proteins serve as toxins that use surface receptors to specifically lyse leukocytes, such as  
63 the bi-component toxins (PVL, LukAB, LukED) (12–14) and phenol soluble modulins  
64 (15). Another group of secreted proteins, of which many are involved in immune evasion,  
65 are the Staphylococcal superantigen-like proteins (SSLs) (16).

66 SSLs are a family of 14 proteins with structural similarity to Staphylococcal

67 superantigens but lack the functional T-cell receptor binding domain and therefore exhibit  
68 no superantigenic activity (17). Moreover, structurally, the C-terminal  $\beta$ -grasp domain of  
69 these SSL proteins show homology to other staphylococcal immune evasion proteins like  
70 CHIPS. SSL1 to SSL11 are encoded on staphylococcal pathogenicity island 2 whereas  
71 SSL12, SSL13 and SSL14 are found on the immune evasion cluster 2 (IEC-2) (4, 18). The  
72 SSL gene cluster is conserved in all human and animal isolates of *S. aureus* examined to  
73 date, indicating that it is very stable and evolutionary important cluster for the organism  
74 (18–20). Furthermore, antibodies against the SSLs are detected in human serum, indicating  
75 that they are expressed *in vivo* and may play a role during infection (20, 21). Even though  
76 the SSLs are highly conserved and involved in innate immune evasion, they have distinct  
77 functions (17). It was reported previously that several SSL members located on the main  
78 cluster (SSL3, SSL5, SSL6, SSL7 and SSL10) are involved in inhibition of host immune  
79 responses (22–25). SSL3 and SSL4 have been described as Toll-like receptor 2 (TLR2)  
80 inhibitors and prevent neutrophil activation (26, 27). SSL5 interacts with neutrophil surface  
81 receptor CD162 and reduces neutrophil migration (7, 23). SSL6 was identified to interact  
82 with CD47 by screening a *S. aureus* secretome phage display library for binding to isolated  
83 human neutrophils (2). SSL7 binds to complement C5 and therefore prevents C5a  
84 production (28). In addition, SSL7 and SSL10 are associated with blocking complement  
85 activation by targeting IgA and IgG respectively (28, 29) . In contrast, none of the SSLs on  
86 the minor cluster (SSL12-14) have been functionally characterized.

87 In this study, we set out to identify new *S. aureus* proteins that interact with human  
88 neutrophils using a *S. aureus* secretome phage display library. In combination with Whole

89 Genome Sequencing (WGS), SSL13 was identified to bind human neutrophils. We show  
90 that binding to human neutrophils is formyl-peptide receptor 2 (FPR2) dependent. Through  
91 this interaction, SSL13 activates neutrophils and acts as a chemoattractant. Furthermore,  
92 SSL13 activated neutrophils exhibit induced oxidative burst and degranulation. In contrast  
93 to many other immune evasion proteins that inhibit immune responses, we identified SSL13  
94 as a chemoattractant and a neutrophil activator that acts via the FPR2.

95

## 96 **Experimental procedures**

97 **Ethics statement.** Informed consent was obtained from all subjects in accordance with the  
98 Declaration of Helsinki. Approval was obtained from the medical ethics committee of the  
99 University Medical Center Utrecht ((METC-protocol 07-125/C approved March 01, 2010;  
100 Utrecht, The Netherlands). The use of animals was approved by the National Ethical  
101 Committee for Animal Experiments (permit no AVD115002016565) and conducted  
102 according to local regulations.

103 **Reagents and antibodies.** Monoclonal antibody (mAb) anti-His Tag (clone AD1.1.10,  
104 FITC-labeled) was purchased from LS Biosciences, and anti-CD62L (clone Dreg-56, FITC-  
105 labeled) and anti-CD11b (clone ICRF44, APC-labeled) were purchased from BD. The  
106 peptide MMK-1 (H-LESIFRSLLFRVM-OH) was synthesized by Sigma, and WKYMVM  
107 was synthesized by Bachem AG(Switzerland). WRWWW-NH2 (WRW4) and Pertussis  
108 toxin were purchased from Tocris. Formyl-methionyl-leucyl phenylalanine (fMLP), TNF- $\alpha$   
109 and cytochalasin B were from Sigma-Aldrich. Fluo-3-AM (acetoxymethyl ester) and

110 Calcein-AM were purchased from Thermo Fisher.

111 **Cloning, expression, and purification of recombinant proteins.** FLIPr, FLIPr-Like and

112 N-terminal His-tag labeled SSL13 (His-SSL13) were cloned, expressed and purified as

113 described (11, 30). For SSL13, primers were designed without signal peptide according to

114 the published sequence of the gene NWMN\_1076 for cloning into modified N-His6-TEV-

115 (g)-pRSET vector (30). SSL13 was amplified from genomic DNA of *S. aureus* subsp.

116 *aureus* strain Newman using the following primers: 5'-

117 CGGGATCCCAATTCCTAATACACCTATC-3' and 5'-

118 ATATGCGGCCGCTTAGTTTGATTTTCGAG -3'. Restriction enzyme recognition sites

119 are underlined. Recombinant protein was generated in *E.coli* Rosetta Gami(DE3) plysS by

120 induction with 1 mM Isopropyl  $\beta$ -D-1-thiogalactopyranoside (Roche). His-tagged protein

121 was isolated under native purification conditions using a 5ml HiTrap chelating HP column

122 (GE Healthcare) with an imidazole gradient (10–250 mM; Sigma- Aldrich). The purified

123 protein was analyzed on a 12.5% SDS- PAGE gel and showed one band corresponding to a

124 mass of 26.8 kD (Fig. S1). For direct fluorescent labeling, His-SSL13 was mixed with 0.1

125 mg/ml FITC (Sigma-Aldrich) in 0.1 M carbonate buffer (pH 9.5) for 1 h at 4°C and

126 subsequently separated from free FITC by overnight dialysis against PBS.

127 **Cells.** Human leukocytes were isolated from human heparinized blood as described (2) and

128 suspended in RPMI-1640 supplemented with 20 mM Hepes (Gibco) containing 0.05% HSA

129 (Sanquin). HL-60 cells were purchased from ATCC, HL-60 cells stable transfected with the

130 human-FPR2 (HL-60/FPR2), were kindly provided by F. Boulay (Laboratoire Biochimie et

131 Biophysique des Systemes Integres, Grenoble, France). Cells were cultured in RPMI-1640  
132 supplemented with 10% fetal bovine serum (FCS), 100 µg/ml streptomycin, 100 units/ml  
133 penicillin.

134 **Phage library construction and phage production.** A *S. aureus* secretome phage display  
135 library was created as described earlier (2). Briefly, genomic DNA from *S. aureus* strain  
136 Newman was mechanically fragmented and fragments were cloned into the pDJ01  
137 secretome phagemid vector (2) and transformed into TG1 *E. coli*. Phages lacking an active  
138 pIII protein were produced overnight by co-infection with Hyperphage<sup>®</sup> helper phages  
139 (Progen) at a multiplicity of infection of 10. Phages were purified and concentrated using  
140 PEG precipitation and resuspended in PBS to yield a final concentration of  $2 \times 10^{11}$   
141 phages/ml.

142 **Phage selection on isolated human neutrophils.** 1 ml of phage library was mixed with 1  
143 ml isolated human neutrophils ( $1 \times 10^7$  in RPMI1640-0.05%HSA) and incubated on ice with  
144 gentle shaking for 30 min. Cells were washed twice by adding 50 ml cold RPMI-HSA and  
145 spinning down. Phages were eluted using 500 µl glycine 0.05M, pH2 for 5 min after which  
146 62.5 µl neutralization buffer (2 M Tris-HCL pH 8.4) was added. Cells and cell debris were  
147 removed by centrifugation and phages were precipitated using 200 µl of 20% PEG/2.5 M  
148 NaCl for 30 min at room temperature. Sample was centrifuged at 14.000 rpm in an  
149 eppendorf centrifuge for 10 min at 4°C and supernatant was discarded. The pellet was  
150 suspended in 100 µl iodide buffer (10mM Tris-HCL, 1mM EDTA, 4M NaI, pH8) to disrupt  
151 the phage coat proteins and release the DNA. DNA was precipitated by adding 250 µl of 100%

152 ethanol and incubated for 30 min at room temperature. Sample was centrifuged at 14,000  
153 rpm in an eppendorf centrifuge for 10 min at 4°C after which the supernatant was discarded  
154 and the pellet containing the single stranded phage DNA was washed with 70% ice cold  
155 ethanol and dried to the air. The non-selected phage library was taken as a control.

156 **Phage library sequencing.** Since the phage library was created using a pIII deficient helper  
157 phage, it consists of non-infectious phage particles. Therefore traditional phage selection  
158 with multiple rounds of selection and amplification is not possible and the library was  
159 analyzed by genome sequencing using the Illumina MiSeq System. In order to add the  
160 MiSeq adapters to the isolated phage DNA, a PCR reaction was performed on the  
161 precipitated DNA using Phusion<sup>®</sup> HF polymerase (New England Biolabs), according to the  
162 manufacturer's recommendations. The primers were designed for compatibility with the  
163 Illumina MiSeq v2 sequencing kit. (Table S1 for primer sequences). The PCR product was  
164 purified using gel purification on an Ultra-pure 2% agarose gel and the purified DNA was  
165 quantified on a Qubit 4 fluorometer (Thermo Fischer Scientific). The purified sample was  
166 run on a 1% agarose gel to determine purity and determine mean fragment size.

167 Sequencing was performed by loading 3pM of the library onto a MiSeq v2 2x250bp  
168 sequencing kit and ran on an Illumina MiSeq System according to manufacturer's  
169 instructions. Sequence data was deposited in ENA under study accession number:  
170 PRJEB26168.

171 **His-SSL13 binding assay.** To determine the binding of His-SSL13 to human leukocytes, a  
172 mixture of isolated neutrophils and mononuclear cells at  $5 \times 10^6$  cells/ml was incubated with  
173 increasing concentrations of His-SSL13 for 30 min at 4°C while gently shaking. Cells were



174 washed and incubated with FITC-labeled anti-His tag mAb while shaking. Cells were  
175 washed and resuspended in buffer containing 1% paraformaldehyde (PFA). The  
176 fluorescence was measured on a FACSVerse flow cytometer, and the different leukocyte  
177 populations (neutrophils, monocytes and lymphocytes) were identified based on forward and  
178 sideward scatter parameters.

179 To determine the binding of His-SSL13 to HL-60 cells,  $5 \times 10^6$  cells/ml HL-60 cells were  
180 incubated with FITC-labeled SSL13 (SSL13-FITC) for 30 min at 4°C while shaking. Cells  
181 were washed and resuspended in buffer with 1% PFA. The fluorescence was measured by  
182 flow cytometry, and cell populations were identified based on forward and sideward scatter  
183 parameters excluding debris and death cells.

184 **CD11b and CD62L expression on neutrophils.** Neutrophils ( $5 \times 10^6$  cells/ml) were  
185 incubated with different concentrations SSL13 for 30 min at 37°C. Subsequently, the cells  
186 were put on ice and incubated with anti-CD11b and anti-CD62L mAb for 45 min on ice.  
187 Cells were washed and fixed with 1% PFA in buffer. Expression of CD11b and CD62L was  
188 measured on a flow cytometer and data expressed relative to the buffer treated cells.

189 **Calcium flux in neutrophils and HL-60 cells.** Calcium flux with isolated human  
190 neutrophils and HL-60 cells was performed in a flow cytometer as previously described (31).  
191 Briefly, cells at  $5 \times 10^6$  cells/ml were labeled with 0.5  $\mu$ M Fluo-3-AM ester, washed and  
192 resuspended to a concentration of  $1 \times 10^6$  cells/ml. To measure cells continuously and be able  
193 to add stimulus without interruption in the FACSVerse flow cytometer, the Eppendorf tube  
194 adapter was used without tube while sampling cells from a 96-well plate on an elevated  
195 platform. Stimuli were added in a  $1/10^{\text{th}}$  sample volume after a 10 seconds baseline

196 recording and calcium flux monitored for 50 seconds post stimulation. Samples were  
197 analyzed after gating neutrophils, thereby excluding cell debris and background noises.  
198 Calcium flux was expressed as difference between baseline fluorescence (mean of time point  
199 3 till 8 sec) and after addition of stimulus (mean of time point 20 till 60 sec).

200 **Chemotaxis.** Neutrophil migration was measured in a 96-multiwell transmembrane system  
201 (ChemoTX; Neuro Probe) using an 8  $\mu\text{m}$  pore size polycarbonate membrane (32). Cells  
202 were labeled with 2  $\mu\text{M}$  calcein-AM for 20 min, and resuspended to a concentration of  
203  $2.5 \times 10^6$  cells/ml in HBSS with 1% HSA. Wells were filled with 29  $\mu\text{l}$  of chemoattractant,  
204 and the membrane holder was carefully assembled. Cells were pre-incubated with or without  
205 FLIPr and 25  $\mu\text{l}$  was placed as a droplet on the membrane. After incubation for 30 min at  
206  $37^\circ\text{C}$  in a humidified 5%  $\text{CO}_2$  atmosphere, the membrane was washed extensively with PBS  
207 to wash away the non-migrating cells, and the fluorescence was measured in a fluorescence  
208 plate reader (CLARIOstar; BMG LABTECH) using 483 nm excitation and 530 emission  
209 filters. Percentage migration was calculated relative to wells containing the maximum  
210 number of 25  $\mu\text{l}$  cells.

211 **Myeloperoxidase (MPO) release.** Neutrophils were treated for 10 min with cytochalasin-B  
212 and TNF-alpha with gently shaking, and without wash, subsequently incubated with buffer  
213 only, SSL13 or fMLP. Cells were centrifugated at 500 x g for 10 min and supernatant  
214 collected for MPO activity measurement (33). Therefore, 10  $\mu\text{l}$  sample was mixed with O-  
215 Dianisidine substrate and  $\text{H}_2\text{O}_2$  in phosphate buffer at pH 6.0 and measured for 30 min at  
216  $37^\circ\text{C}$  in a plate reader (FLUO star Omega) at 450 nm.

217 **Neutrophil oxidative burst assay.** Horseradish peroxidase (HRP) and Isoluminol were used

218 as a sensitive measure of the human neutrophil oxidative burst as described (34, 35). In  
219 white 96-well microtiter plates, a 150  $\mu$ l reaction mixture of  $6.25 \times 10^4$  neutrophils per well  
220 in IMDM buffer with 0.1% HSA plus 50  $\mu$ M Isoluminol and 4 U/ml HRP was equilibrated  
221 for 5 min. Subsequently concentrated stimulus was added to activate the NADPH-oxidase  
222 and emitted light immediately recorded continuously for 15 min in a Luminometer (Berthold)  
223 at 37°C. Data are expressed as relative light units (RLU).

224 **Mouse Experiments.** In the mouse peritonitis model, 100  $\mu$ g protein in 0.5 ml PBS was  
225 injected into the peritoneum of 6- to 8-week-old female CD-1 mice. At 4 hours later, the  
226 mice were euthanized by cervical dislocation and abdominal cavities washed with two times  
227 5 ml of RPMI medium containing 0.1% HSA and 5mM EDTA. In total 8 to 9 ml of  
228 peritoneal fluid was recovered and centrifuged at 1200 rpm for 10 min to collect the exudate  
229 cells. Cell pellets were resuspended in 500  $\mu$ l buffer and counted with trypan blue in a TC20  
230 automated cell counter (BioRad). Before immuno staining, cells were first preincubated with  
231 100  $\mu$ g/ml normal goat IgG for 15 min. We stained the samples with APC-conjugated  
232 antibody to mouse CD45 (leukocytes marker), PE-conjugated antibody to mouse Gr1  
233 (neutrophil marker), and FITC-conjugated antibody to mouse F4/80(macrophage marker).  
234 Samples were analyzed on a flow cytometer.

235 Mouse neutrophils were isolated from bone marrow as described previously (36).  
236 Briefly, a bone marrow cell suspension was collected by flushing the femurs and tibiae  
237 with 10 ml of cold HBSS + 15 mM EDTA + 30 mM Hepes + 0.1 % HSA. A two-layer  
238 Percoll density gradient (2 ml each in PBS) composed of 81% and 62.5% was used to  
239 enrich neutrophils from the total leucocyte population. Interphase between between 62.5%

240 and 81% was collected. Cells were washed once with buffer and resuspended in  
241 PRMI1640 with 0.1% HSA.

242 Calcium fluxes in mouse neutrophils were determined as described above for human  
243 neutrophils with final concentrations of 10, 3, 1, 0.3, 0.1 and 0.03 nM of WKYMVM and  
244 1000, 300, 100, 30, 10 and 3 nM of SSL13.

245 Mouse neutrophil binding assays were conducted essentially as described for human  
246 neutrophils.

247

## 248 **Results**

### 249 **Phage library sequencing and identification of immune evasion**

250 The sequencing run produced a total of 1,396 and 23,411 paired-end reads for the  
251 unselected and selection library, respectively. These reads were then quality-trimmed using  
252 nelsoni clip v. 0.128 with the following parameters: --adaptor-clip yes --match 10 --max-  
253 errors 1 --clip-ambiguous yes --quality 10 --length 150  
254 (<http://www.vicbioinformatics.com/software.nelsoni.shtml>). About 90% of the read pairs  
255 were retained and used for further analyses.

256 Quality-trimmed sequence reads were aligned to the Genbank database (accessed on  
257 July 20<sup>th</sup>, 2015) using BLAST+ 2.2.31. 3 sequences in the non-selected and 4 sequences in  
258 the selected library did not align with a *S. aureus* genome and were omitted from analysis.  
259 The read frequency was defined as the total count of identical reads. The total amount of  
260 unique sequences per annotated gene was defined as number of clones. The highest hit in the  
261 unselected library is annotated as a dUTPase with a read frequency of 14 all belonging to a

262 single clone. The 96 reads with the highest read frequency after selection encode for 61  
263 different proteins that are listed in table S2. There is a large increase in read frequency after  
264 selection. The highest read frequency with 883 reads encoding 7 unique sequences is  
265 annotated as a transmembrane protein involved in mannitol transport. The selection of  
266 transmembrane proteins when performing phage display selection on cells was also  
267 observed in earlier phage selections in our lab (data not shown). The presence of membranes  
268 appear to select for transmembrane domains especially transporter proteins like ABC-  
269 transporters. The second highest hit with 196 reads and 4 different clones identified the  
270 recently described *S. aureus* protein (SPIN) that binds neutrophil myeloperoxidase and  
271 promotes the intracellular survival of *S. aureus* after phagocytosis (30). Of the total of 61  
272 identified proteins, 12 (20%) were described to play a role in host microbe interaction. Of  
273 these 11 were already functionally characterized and for 1 protein, SSL13, no known  
274 function has been described. The fact that SSL13 was identified in this selection suggests  
275 that it is involved in binding to neutrophils or its components.

### 276 **SSL13 specifically interacts with human neutrophils**

277 To confirm that SSL13 interacts directly with human neutrophils, a three-fold dilution  
278 series of recombinant SSL13 with an N-terminal His tag was incubated with human  
279 leukocytes isolated from healthy donors. His-tagged SSL7 and SSL5 were included as  
280 negative and positive control neutrophil-binding proteins respectively (7, 37). We observed  
281 that SSL13 interacts with human neutrophils and monocytes in a dose dependent manner,  
282 but no significant binding was observed to lymphocytes (Fig. 1A-C).

283 Interestingly, binding experiments conducted at 37°C indicated that SSL13 activates

284 neutrophils as shown by an increase in forward scatter compared with untreated cells (no  
285 protein) (38, 39) (Fig. S2 A-C). Activation of neutrophils generally alters the surface  
286 expression of major cell adhesion molecules, e.g. up-regulation of CD11b and down-  
287 regulation of CD62L (4). The effect of SSL13 on CD11b and CD62L expression was  
288 evaluated by flow cytometry. We observed that SSL13 enhanced the surface expression of  
289 CD11b and simultaneously down-regulated the expression of CD62L in a dose-dependent  
290 manner (Fig. 2A-B). In addition to the altered expression of surface adhesion molecules,  
291 activated neutrophils also exhibit intracellular release of calcium (40). We therefore  
292 measured the intracellular release of calcium after neutrophil exposure to a range of SSL13  
293 concentrations (23–740 nM). In concordance with the cell receptor expression assay, our  
294 calcium flux data showed that SSL13 induces a transient dose-dependent release of  $Ca^{2+}$  in  
295 neutrophils (Fig. 2C-D). Degradation of SSL13 by proteinase K completely abolished the  
296 neutrophil activation indicating that the observed activation is not caused by a non-protein  
297 contaminant in the SSL13 preparation (Fig. S3 A-D). To conclude, SSL13 specifically binds,  
298 and activates human neutrophils.

## 299 **SSL13 specifically binds and activates formyl peptide receptor 2**

300 As SSL13 induced a rapid and transient release of intracellular  $Ca^{2+}$ , we examined  
301 whether SSL13 acts through a G protein-coupled receptor (GPCR) (41). Pertussis toxin  
302 (PTX) is a general antagonist of GPCR activation, and therefore blocks the release of  
303 intracellular  $Ca^{2+}$  (42). For this purpose, neutrophils were preincubated with or without PTX  
304 for 1 h at 37°C with  $CO_2$ , and then stimulated with 370 nM SSL13 or fMLP as a reference  
305 PTX-sensitive stimulus (43, 44). Fig. 3A shows that PTX can block both SSL13 and fMLP

306 induced neutrophil activation, which confirms that SSL13 utilizes a PTX-sensitive GPCR to  
307 induce this response.

308 To further investigate the responsible receptor, a set of well-characterized agonists and  
309 antagonists of neutrophil GPCRs were tested, including those for formyl peptide receptor 1  
310 (FPR1) and 2 (FPR2), Leukotriene B4 receptor, platelet activating factor (PAF) receptor,  
311 Complement C5a receptor, and the IL-8 receptors CXCR1 and CXCR2. We found that the  
312 FPR2 antagonists FLIPr inhibited the SSL13 induced calcium mobilization as well as the  
313 binding to human neutrophils (Fig. 3B-C). Although FLIPr also slightly inhibits the FPR1  
314 activation, the control protein CHIPS, that specifically inhibits FPR1 (11), had no effect on  
315 SSL13-mediated neutrophil activation (Fig. 3C). Together, these experiments indicate that  
316 SSL13 elicits calcium fluxes in human neutrophils via FPR2.

317 To further confirm that FPR2 is the receptor for SSL13, we used HL60 cells stably  
318 transfected with or without human FPR2 (45, 46). Binding of FITC-labeled SSL13 was only  
319 observed with HL60/FPR2 and not with control HL60 cells (Fig. 3D). Furthermore, in order  
320 to evaluate the role of FPR2 in recognizing SSL13, we analyzed the intracellular  $Ca^{2+}$   
321 response to SSL13 of HL60 with or without FPR2. Fig. 3E shows that SSL13 induces a  
322 profound calcium flux in HL60/FPR2, but not in untransfected HL60 cells. The activation  
323 potential of SSL13 is comparable to the specific FPR2 agonistic peptide MMK-1 (Fig. 3E).  
324 Moreover, SSL13 activates the FPR2 transfected HL60 cells in a dose dependent manner  
325 (Fig. 3F). Finally, the induced calcium flux of the FPR2 transfected HL60 cells by SSL13  
326 and MMK-1 can be inhibited by the FPR2-specific inhibitor FLIPr (Fig. 3G). These findings  
327 confirm that SSL13 specifically binds and activates cells via FPR2.

328 **SSL13 is involved in chemoattractant induced oxidative burst and degranulation of**  
329 **neutrophils**

330 Triggering FPR2 induces many neutrophil effector functions, including chemotaxis,  
331 exocytosis and superoxide generation (47). To investigate whether SSL13 is a  
332 chemoattractant, neutrophil migration was measured in a 96-multiwell transmembrane  
333 system. Indeed, SSL13 stimulates chemotaxis of human neutrophils in a dose-dependent  
334 manner (Fig. 4A). Moreover, the SSL13 induced chemotaxis in human neutrophils can be  
335 blocked by the FPR2 antagonist FLIPr (Fig. 4B).

336 A common feature of most GPCRs is that they not only strongly activate the  
337 chemotactic migration of neutrophils, but also trigger neutrophil oxidative burst and  
338 degranulation. To examine whether SSL13 is involved in FPR2-induced oxidative burst, a  
339 Reactive Oxygen Species (ROS) assay was performed. The peptides WKYMVM and  
340 MMK-1 can both induce FPR2-mediated ROS production, although WKYMVM is more  
341 potent and was therefore used as control in our experiment (48). Our data shows that SSL13  
342 induced a modest oxidative burst compared with the control FPR2 specific peptide  
343 WKYMVM (Fig. 4C), but both SSL13- and WKYMVM-induced oxidative burst in human  
344 neutrophils could be blocked by FLIPr (Fig. 4C). Furthermore, we tested whether SSL13  
345 could induce neutrophil degranulation by measuring myeloperoxidase (MPO) activity in  
346 stimulated cell supernatant. MPO is one of the most abundantly granule proteins in  
347 neutrophils and efficiently released into the extracellular space during degranulation (49).  
348 Indeed, SSL13 induces neutrophil degranulation (Fig. 4D). Taken together, the functional  
349 outcomes of SSL13-induced neutrophil activation include chemotaxis, ROS production and  
350 neutrophil degranulation pointing toward a pro-inflammatory response of neutrophils to



351 this staphylococcal protein.

352 To test whether SSL13 could act intracellular and are produced by *S.aureus* after uptake  
353 by human neutrophils, we generated a GFP promoter construct. Since SSL13 is part of  
354 operon together with SSL12 and SSL14, the SSL12-13-14 promoter was cloned in front of  
355 GFP and transformed into *S.aureus* Newman. We did not observe expression of GFP under  
356 various standard culture conditions or after uptake of bacteria by phagocytes as seen with  
357 some other staphylococcal immune evasion proteins (SPIN) (data not show here) (33).

### 358 **SSL13 is not able to efficiently activate mouse neutrophils**

359 Many other Staphylococcal immune evasion proteins show a high level of human  
360 specificity. In order to check the host-dependent activation of SSL13, we tested binding and  
361 activation of neutrophils isolated from mice bone marrow. SSL13 can induce activation of  
362 murine neutrophils as shown by calcium mobilization. Treating the cells with WRW4, a  
363 known inhibitor of mice FPR2 (50), prevented the SSL13-induced calcium flux. This  
364 indicates that the neutrophil activation by SSL13 happened in a murine FPR2 dependent  
365 manner (Fig. 5A), although much higher concentrations are needed as compared to human  
366 neutrophil activation (Fig. 5B). In contrast, the specific FPR2 agonistic peptide WKYMVM  
367 showed similar activation ability to both human and murine neutrophils (Fig. 5C). However,  
368 we are unable to detect any SSL13 binding to murine neutrophils (data not shown).

369 Since there was a minimal but specific activation of mouse neutrophils, we tested  
370 whether SSL13 can provoke a neutrophil influx after injection of SSL13 into the mouse-  
371 abdominal cavity. We observed no increase in peritoneal neutrophil numbers at 4 h after  
372 intra-abdominal injection of 100 µg SSL13 (data not show). This indicates that SSL13 is

373 highly adapted to specifically act on human neutrophils.

374

## 375 **Discussion**

376 Previously, our group described a high-throughput binding selection strategy, phage  
377 display, to identify *S. aureus* immune evasion molecules. In this strategy, only secreted  
378 proteins of a bacterial genome are expressed on the surface of a filamentous phage, which is  
379 well suited to identify and characterize immune evasion proteins (2). Traditional phage  
380 selection strategies involve multiple rounds of selection and amplification and selecting  
381 single clones for sequencing and further analysis. Whole genome Illumina sequencing  
382 allows to analyze a phage library after only a single round of selection omitting library  
383 amplification that would undoubtedly lead to additional selection bias. Using this strategy  
384 we identified 12 proteins involved in host microbe interaction or immune evasion in a single  
385 round of selection indicating the enormous potential of this strategy. Furthermore, 8  
386 conserved hypothetical proteins identified need further characterization, and may also be  
387 involved in host microbe interaction. The identification of SSL13, a protein with previously  
388 unknown function, in this phage selection suggested an interaction between SSL13 and  
389 neutrophils.

390 The SSLs are a family of 14 secreted proteins which were previously demonstrated to  
391 modulate immune evasion (3, 4, 17). Genetic analyses of 88 clinical *S. aureus* strains  
392 revealed that the genes encoding SSL12, SSL13, and SSL14 are conserved among all strains  
393 (51). We also confirm that SSL13 is produced *in vivo* as antibodies against those proteins  
394 can be detected in human serum (Fig. S4). Furthermore, in sharp contrast to the SSLs

395 located on SPI-2 that all have their own promoter, SSL12-13-14 share a single promoter.  
396 Our hypothesis is that SSL12-13-14 may be produced simultaneously by *S. aureus* under  
397 certain conditions and that their function is linked. We show that SSL13 interacts with  
398 human neutrophils via FPR2. This interaction leads to activation and chemotaxis. We  
399 propose that the chemotactic property of SSL13, via FPR2, is important during early  
400 infection with *S. aureus* to lure neutrophils to the site of infection. Further studies should  
401 resolve the function of SSL12 and SSL14, which are simultaneously expressed under the  
402 same promoter. Just like the *S. aureus* bi-component toxin PVL requires LukS-PV and  
403 LukF-PV to properly lyse neutrophils (12), SSL12-13-14 might require the presence of all  
404 three proteins to elicit its maximum potential in immune modulation. Expression and  
405 secretion of SSLs under standard culture conditions is very limited and only low amounts of  
406 protein can be found in the cell culture supernatant. Previous research showed that there is  
407 an impressive upregulation and expression of some SSLs under different stress conditions  
408 (52). We indeed could not observe SSL13 expression by using GFP reporter construct in  
409 standard cell culture or after uptake by neutrophils.

410 SSL13 is not the only secreted molecule from *S. aureus* that is able to activate  
411 neutrophils. Phenol Soluble Modulins (PSMs), which are small peptides secreted by *S.*  
412 *aureus*, and have completely different structure compared to SSL13, are known to activate  
413 and attract both human and mice neutrophils via FPR2 (15, 50, 53). In addition to this,  
414 micromolar concentrations of PSM have cell lytic activity which is independent from FPR2.  
415 Serum can fully block PSMs functions in both the cell lysis and FPR2-mediated neutrophil  
416 activation (15). However, SSL13 activity was not inhibited by serum and SSL13 is not

417 cytotoxic to neutrophils (Fig. S5). In contrast to PSMs, SSL13 showed a high degree of  
418 human specificity that was not able to efficiently activate mouse neutrophils.

419 FLIPr and its homologue FLIPr-like (FLIPrL) are located on the same IEC-2 cluster as  
420 SSL13, which are found in many, but not all, human *S. aureus* isolates (51). SSL13 is a  
421 neutrophil chemoattractant and activator that acts via the FPR2, whereas FLIPr and FLIPrL  
422 bind and inhibit FPR2 signaling function (10, 11). This may contribute to the ability of *S.*  
423 *aureus* to adjust a favorable balance between neutrophil activation and inhibition. Similar to  
424 other staphylococcal immune evasion proteins, many of the SSL proteins harbor several  
425 distinct functions. Therefore, it is not unlikely that SSL13 may has another unique function  
426 beyond activating FPR2 signaling. To conclude, SSL13 is a unique SSL member that does  
427 not belong to the immune evasion class, but is a pathogen alarming molecule acting on  
428 FPR2.

## 429 **ACKNOWLEDGMENTS**

430 This work was supported by a grant from the program of China Scholarships Council (No.  
431 201406170045). We thank Vincent P van Hensbergen for sharing expertise and reviewing  
432 the manuscript.

433

## 434 **Reference**

- 435 1. Spaan AN, Surewaard BGJ, Nijland R, van Strijp JAG. 2013. Neutrophils Versus  
436 *Staphylococcus aureus*: A Biological Tug of War. *Annu Rev Microbiol* 67:629–650.
- 437 2. Fevre C, Bestebroer J, Mebius MM, de Haas CJC, van Strijp JAG, Fitzgerald JR,  
438 Haas PJA. 2014. *Staphylococcus aureus* proteins SSL6 and SEIX interact with  
439 neutrophil receptors as identified using secretome phage display. *Cell Microbiol*  
440 16:1646–1665.
- 441 3. Koymans KJ, Vrieling M, Gorham RD, van Strijp JAG. 2016. Staphylococcal  
442 Immune Evasion Proteins: Structure, Function, and Host Adaptation. *Curr Top*  
443 *Microbiol Immunol* 6:23–27.
- 444 4. Jongerius I, Köhl J, Pandey MK, Ruyken M, van Kessel KPM, van Strijp JAG,

- 445 Rooijackers SHM. 2007. Staphylococcal complement evasion by various convertase-  
446 blocking molecules. *J Exp Med* 204:2461–2471.
- 447 5. van Kessel KPM, Bestebroer J, van Strijp JAG. 2014. Neutrophil-mediated  
448 phagocytosis of *Staphylococcus aureus*. *Front Immunol* 5:1–12.
- 449 6. Voyich JM, Braughton KR, Sturdevant DE, Whitney AR, Said-Salim B, Porcella SF,  
450 Long RD, Dorward DW, Gardner DJ, Kreiswirth BN, Musser JM, DeLeo FR. 2005.  
451 Insights into Mechanisms Used by *Staphylococcus aureus* to Avoid Destruction by  
452 Human Neutrophils. *J Immunol* 175:3907–3919.
- 453 7. Bestebroer J, Poppelier MJG, Ulfman LH, Lenting PJ, Denis C V., Van Kessel KPM,  
454 Van Strijp JAG, De Haas CJC. 2007. Staphylococcal superantigen-like 5 binds  
455 PSGL-1 and inhibits P-selectin-mediated neutrophil rolling. *Blood* 109:2936–2943.
- 456 8. Chavakis T, Hussain M, Kanse SM, Peters G, Bretzel RG, Flock JI, Herrmann M,  
457 Preissner KT. 2002. *Staphylococcus aureus* extracellular adherence protein serves as  
458 anti-inflammatory factor by inhibiting the recruitment of host leukocytes. *Nat Med*  
459 8:687–693.
- 460 9. de Haas CJC, Veldkamp KE, Peschel A, Weerkamp F, Van Wamel WJB, Heezius  
461 ECJM, Poppelier MJG, Van Kessel KPM, van Strijp JAG. 2004. Chemotaxis  
462 inhibitory protein of *Staphylococcus aureus*, a bacterial antiinflammatory agent. *J Exp*  
463 *Med* 199:687–95.
- 464 10. Prat C, Bestebroer J, de Haas CJC, van Strijp JAG, van Kessel KPM. 2006. A New  
465 Staphylococcal Anti-Inflammatory Protein That Antagonizes the Formyl Peptide  
466 Receptor-Like 1. *J Immunol* 177:8017–8026.
- 467 11. Prat C, Haas PJA, Bestebroer J, de Haas CJC, van Strijp JAG, van Kessel KPM. 2009.  
468 A homolog of formyl peptide receptor-like 1 (FPRL1) inhibitor from *Staphylococcus*  
469 *aureus* (FPRL1 inhibitory protein) that inhibits FPRL1 and FPR. *J Immunol*  
470 183:6569–6578.
- 471 12. Spaan AN, Henry T, Van Rooijen WJM, Perret M, Badiou C, Aerts PC, Kemmink J,  
472 De Haas CJC, Van Kessel KPM, Vandenesch F, Lina G, Van Strijp JAG. 2013. The  
473 staphylococcal toxin panton-valentine leukocidin targets human C5a receptors. *Cell*  
474 *Host Microbe* 13:584–594.
- 475 13. DuMont AL, Yoong P, Day CJ, Alonzo F, McDonald WH, Jennings MP, Torres VJ.  
476 2013. *Staphylococcus aureus* LukAB cytotoxin kills human neutrophils by targeting  
477 the CD11b subunit of the integrin Mac-1. *Proc Natl Acad Sci* 110:10794–10799.
- 478 14. Alonzo F, Kozhaya L, Rawlings SA, Reyes-Robles T, Dumont AL, Myszka DG,  
479 Landau NR, Unutmaz D, Torres VJ. 2013. CCR5 is a receptor for *Staphylococcus*  
480 *aureus* leukotoxin ED. *Nature* 493:51–55.
- 481 15. Surewaard BGJ, Nijland R, Spaan AN, Kruijtz JAW, de Haas CJC, van Strijp JAG.  
482 2012. Inactivation of staphylococcal phenol soluble modulins by serum lipoprotein  
483 particles. *PLoS Pathog* 8.
- 484 16. Thammavongsa V, Kim HK, Missiakas D, Schneewind O. 2015. Staphylococcal  
485 manipulation of host immune responses. *Nat Rev Microbiol* 13:529–43.
- 486 17. Fraser JD, Proft T. 2008. The bacterial superantigen and superantigen-like proteins.  
487 *Immunol Rev* 225:226–243.
- 488 18. Kuroda M, Ohta T, Uchiyama I, Baba T, Yuzawa H, Kobayashi I, Kobayashi N, Cui

- 489 L, Oguchi A, Aoki KI, Nagai Y, Lian JQ, Ito T, Kanamori M, Matsumaru H,  
490 Maruyama A, Murakami H, Hosoyama A, Mizutani-Ui Y, Takahashi NK, Sawano T,  
491 Inoue RI, Kaito C, Sekimizu K, Hirakawa H, Kuhara S, Goto S, Yabuzaki J, Kanehisa  
492 M, Yamashita A, Oshima K, Furuya K, Yoshino C, Shiba T, Hattori M, Ogasawara N,  
493 Hayashi H, Hiramatsu K. 2001. Whole genome sequencing of meticillin-resistant  
494 *Staphylococcus aureus*. *Lancet* 357:1225–1240.
- 495 19. Smyth DS, Meaney WJ, Hartigan PJ, Smyth CJ. 2007. Occurrence of *ssl* genes in  
496 isolates of *Staphylococcus aureus* from animal infection. *J Med Microbiol* 56:418–  
497 425.
- 498 20. Fitzgerald JR, Reid SD, Ruotsalainen E, Tripp TJ, Liu MY, Cole R, Kuusela P,  
499 Schlievert PM, Järvinen A, Musser JM. 2003. Genome diversification in  
500 *Staphylococcus aureus*: Molecular evolution of a highly variable chromosomal region  
501 encoding the staphylococcal exotoxin-like family of proteins. *Infect Immun* 71:2827–  
502 2838.
- 503 21. Al-Shangiti AM, Nair SP, Chain BM. 2005. The interaction between staphylococcal  
504 superantigen-like proteins and human dendritic cells. *Clin Exp Immunol* 140:461–469.
- 505 22. Bestebroer J, Van Kessel KPM, Azouagh H, Walenkamp AM, Boer IGJ, Romijn RA,  
506 Van Strijp JAG, De Haas CJC. 2009. Staphylococcal SSL5 inhibits leukocyte  
507 activation by chemokines and anaphylatoxins. *Blood* 113:328–337.
- 508 23. Baker HM, Basu I, Chung MC, Caradoc-Davies T, Fraser JD, Baker EN. 2007.  
509 Crystal Structures of the Staphylococcal Toxin SSL5 in Complex with Sialyl Lewis X  
510 Reveal a Conserved Binding Site that Shares Common Features with Viral and  
511 Bacterial Sialic Acid Binding Proteins. *J Mol Biol* 374:1298–1308.
- 512 24. Walenkamp AME, Boer IGJ, Bestebroer J, Rozeveld D, Timmer-Bosscha H, Hemrika  
513 W, van Strijp JAG, de Haas CJC. 2009. Staphylococcal superantigen-like 10 inhibits  
514 CXCL12-induced human tumor cell migration. *Neoplasia* 11:333–44.
- 515 25. Langley R, Wines B, Willoughby N, Basu I, Proft T, Fraser JD. 2005. The  
516 Staphylococcal Superantigen-Like Protein 7 Binds IgA and Complement C5 and  
517 Inhibits IgA-Fc RI Binding and Serum Killing of Bacteria. *J Immunol* 174:2926–  
518 2933.
- 519 26. Bardoel BW, Vos R, Bouman T, Aerts PC, Bestebroer J, Huizinga EG, Brondijk THC,  
520 Van Strijp JAG, De Haas CJC. 2012. Evasion of Toll-like receptor 2 activation by  
521 staphylococcal superantigen-like protein 3. *J Mol Med* 90:1109–1120.
- 522 27. Hanzelmann D, Joo H-S, Franz-Wachtel M, Hertlein T, Stevanovic S, Macek B,  
523 Wolz C, Götz F, Otto M, Kretschmer D, Peschel A. 2016. Toll-like receptor 2  
524 activation depends on lipopeptide shedding by bacterial surfactants. *Nat Commun*  
525 7:12304.
- 526 28. Bestebroer J, Aerts PC, Rooijackers SHM, Pandey MK, Köhl J, Van Strijp JAG, De  
527 Haas CJC. 2010. Functional basis for complement evasion by staphylococcal  
528 superantigen-like 7. *Cell Microbiol* 12:1506–1516.
- 529 29. Patel D, Wines BD, Langley RJ, Fraser JD. 2010. Specificity of staphylococcal  
530 superantigen-like protein 10 toward the human IgG1 Fc domain. *J Immunol*  
531 184:6283–6292.
- 532 30. de Jong NWM, Ramyar KX, Guerra FE, Nijland R, Fevre C, Voyich JM, McCarthy



- 533 AJ, Garcia BL, van Kessel KPM, van Strijp JAG, Geisbrecht B V., Haas P-JA. 2017.  
534 Immune evasion by a staphylococcal inhibitor of myeloperoxidase. *Proc Natl Acad*  
535 *Sci* 201707032.
- 536 31. de Haas CJC, Veldkamp KE, Peschel A, Weerkamp F, Van Wamel WJB, Heezius  
537 ECJM, Poppelier MJG, Van Kessel KPM, van Strijp JAG. 2004. Chemotaxis  
538 Inhibitory Protein of *Staphylococcus aureus*, a Bacterial Antiinflammatory Agent. *J*  
539 *Exp Med* 199:687–695.
- 540 32. Bestebroer J, Van Kessel KPM, Azouagh H, Walenkamp AM, Boer IGJ, Romijn RA,  
541 van Strijp JAG, De Haas CJC. 2009. Staphylococcal SSL5 inhibits leukocyte  
542 activation by chemokines and anaphylatoxins. *Blood* 113:328–337.
- 543 33. van Kessel KPM, van Strijp JAG, Verhoef JAN. 1991. Inactivation of recombinant  
544 human tumor necrosis factor-alpha by proteolytic enzymes released from stimulated  
545 human neutrophils. *J Immunol* 147:3862–3868.
- 546 34. Dahlgren C, Karlsson A, Bylund J. 2007. Measurement of respiratory burst products  
547 generated by professional phagocytes. *Methods Mol Biol* 412:349–363.
- 548 35. Önnheim K, Bylund J, Boulay F, Dahlgren C, Forsman H. 2008. Tumour necrosis  
549 factor (TNF)- $\alpha$  primes murine neutrophils when triggered via formyl peptide  
550 receptor-related sequence 2, the murine orthologue of human formyl peptide receptor-  
551 like 1, through a process involving the type I TNF receptor and subcellular gran.  
552 *Immunology* 125:591–600.
- 553 36. Boxio R, Bossenmeyer-Pourié C, Vanderesse R, Dournon C, Nüsse O. 2005. The  
554 immunostimulatory peptide WKYMVm-NH activates bone marrow mouse  
555 neutrophils via multiple signal transduction pathways. *Scand J Immunol* 62:140–147.
- 556 37. Laursen NS, Gordon N, Hermans S, Lorenz N, Jackson N, Wines B, Spillner E,  
557 Christensen JB, Jensen M, Fredslund F, Bjerre M, Sottrup-Jensen L, Fraser JD,  
558 Andersen GR. 2010. Structural basis for inhibition of complement C5 by the SSL7  
559 protein from *Staphylococcus aureus*. *Proc Natl Acad Sci U S A* 107:3681–6.
- 560 38. Fletcher MP, Seligmann BE. 1985. Monitoring human neutrophil granule secretion by  
561 flow cytometry: secretion and membrane potential changes assessed by light scatter  
562 and a fluorescent probe of membrane potential. *J Leukoc Biol* 37:431–447.
- 563 39. Cole AT, Garlick NM, Galvin AM, Hawkey CJ, Robins RA. 1995. A flow cytometric  
564 method to measure shape change of human neutrophils. *Clin Sci* 89:549–554.
- 565 40. Hamm HE. 1998. The many faces of G protein signaling. *J Biol Chem*.
- 566 41. Bestebroer J, De Haas CJC, van Strijp JAG. 2010. How microorganisms avoid  
567 phagocyte attraction. *FEMS Microbiol Rev* 34:395–414.
- 568 42. Welin A, Björnsdóttir H, Winther M, Christenson K, Oprea T, Karlsson A, Forsman  
569 H, Dahlgren C, Bylund J. 2015. CFP-10 from *Mycobacterium tuberculosis* selectively  
570 activates human neutrophils through a pertussis toxin-sensitive chemotactic receptor.  
571 *Infect Immun* 83:205–213.
- 572 43. Bokoch GM, Gilman AG. 1984. Inhibition of receptor-mediated release of  
573 arachidonic acid by pertussis toxin. *Cell* 39:301–308.
- 574 44. Lad PM, Olson C V, Smiley PA. 1985. Association of the N-formyl-Met-Leu-Phe  
575 receptor in human neutrophils with a GTP-binding protein sensitive to pertussis toxin.  
576 *Proc Natl Acad Sci U S A* 82:869–873.

- 577 45. Dahlgren C, Christophe T, Boulay F, Madianos PN, Rabiet MJ, Karlsson A. 2000.  
578 The synthetic chemoattractant Trp-Lys-Tyr-Met-Val-DMet activates neutrophils  
579 preferentially through the lipoxin A(4) receptor. *Blood* 95:1810–1818.
- 580 46. Christophe T, Karlsson A, Rabiet MJ, Boulay F, Dahlgren C. 2002. Phagocyte  
581 activation by Trp-Lys-Tyr-Met-Val-Met, acting through FPRL1/LXA4R, is not  
582 affected by lipoxin A4. *Scand J Immunol* 56:470–476.
- 583 47. Fu H, Karlsson J, Bylund J, Movitz C, Karlsson A, Dahlgren C. 2006. Ligand  
584 recognition and activation of formyl peptide receptors in neutrophils. *J Leukoc Biol*  
585 79:247–256.
- 586 48. Karlsson J, Stenfeldt AL, Rabiet M-J, Bylund J, Forsman HF, Dahlgren C. 2009. The  
587 FPR2-specific ligand MMK-1 activates the neutrophil NADPH-oxidase, but triggers  
588 no unique pathway for opening of plasma membrane calcium channels. *Cell Calcium*  
589 45:431–438.
- 590 49. Borregaard N. 2010. Neutrophils, from Marrow to Microbes. *Immunity*.
- 591 50. Kretschmer D, Gleske A-K, Rautenberg M, Wang R, Köberle M, Bohn E,  
592 Schöneberg T, Rabiet M-J, Boulay F, Klebanoff SJ, van Kessel KPM, van Strijp JAG,  
593 Otto M, Peschel A. 2010. Human formyl peptide receptor 2 senses highly pathogenic  
594 *Staphylococcus aureus*. *Cell Host Microbe* 7:463–73.
- 595 51. McCarthy AJ, Lindsay JA. 2013. *Staphylococcus aureus* innate immune evasion is  
596 lineage-specific: A bioinformatics study. *Infect Genet Evol* 19:7–14.
- 597 52. Torres VJ, Stauff DL, Pishchany G, Bezbradica JS, Gordy LE, Iturregui J, Anderson  
598 KLL, Dunman PM, Joyce S, Skaar EP. 2007. A *Staphylococcus aureus* Regulatory  
599 System that Responds to Host Heme and Modulates Virulence. *Cell Host Microbe*  
600 1:109–119.
- 601 53. Weiss E, Hanzelmann D, Fehlhaber B, Klos A, Von Loewenich FD, Liese J, Peschel  
602 A, Kretschmer D. 2017. Formyl-peptide receptor 2 governs leukocyte influx in local  
603 *staphylococcus aureus* infections. *FASEB J* 32:1–12.
- 604



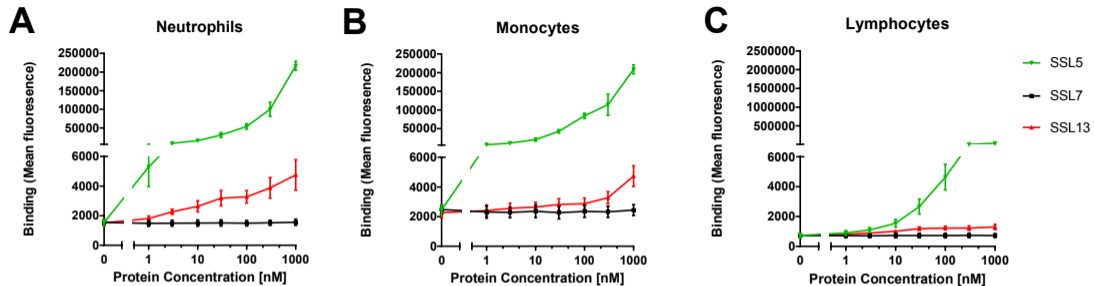

**Fig 1. SSL13 binds to human neutrophils, monocytes, but not lymphocytes.** Peripheral blood leukocytes were incubated with a three-fold dilution series of His-SSL13 for 30 min at 4 °C. Binding was detected with anti-His-FITC and analyzed by flow cytometry. The different cell populations were identified based on scatter parameters. His-SSL5 and His-SSL7 are positive and negative controls for binding respectively (A, B and C). Error bars are SEM of three biological replicates analyzed in duplicate.

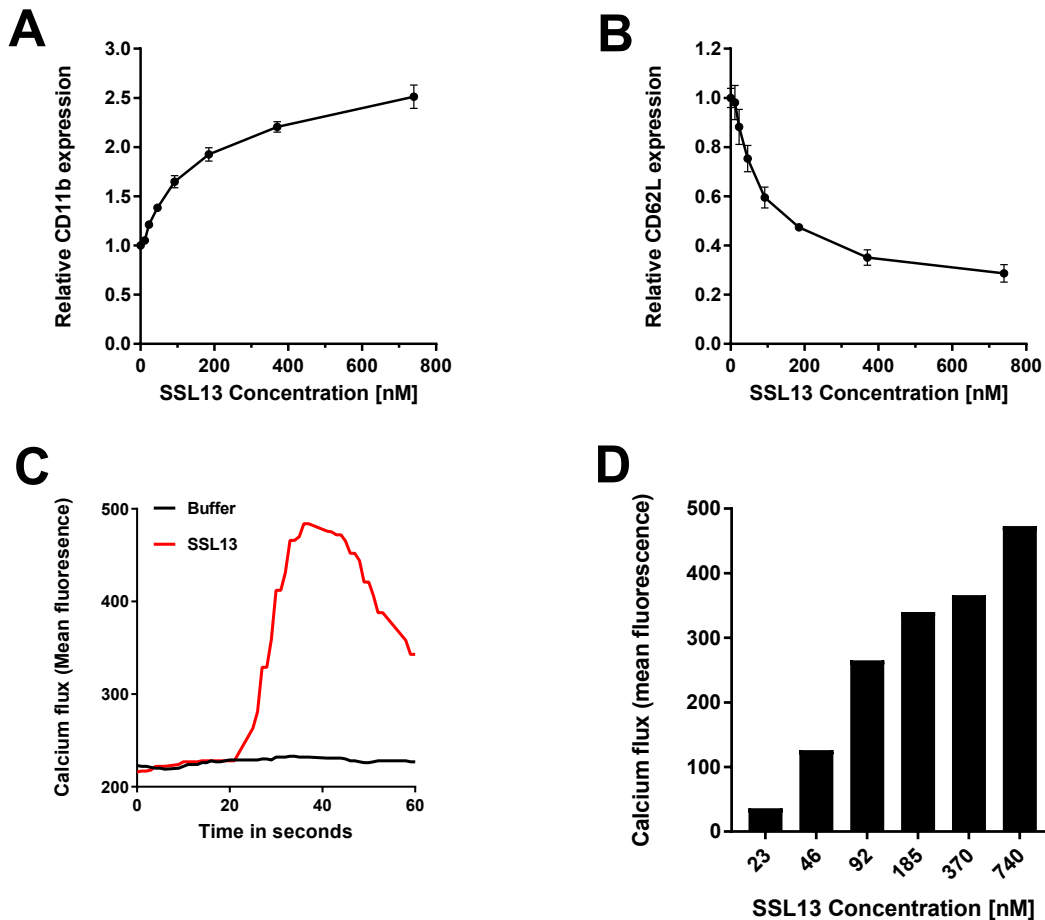

**Fig 2. SSL 13 activates human neutrophils.** (A and B) Activation of isolated human neutrophils by increasing concentration of SSL13. Increased CD11b expression (A) and decreased CD62L expression (B) are markers for neutrophil activation. Data are mean fluorescence  $\pm$  SEM of three independent experiments. (C and D) Addition of SSL13 induces cell activation measured as a transient release of intracellular calcium (C). This effect is concentration dependent (D). Data are from one representative experiment.

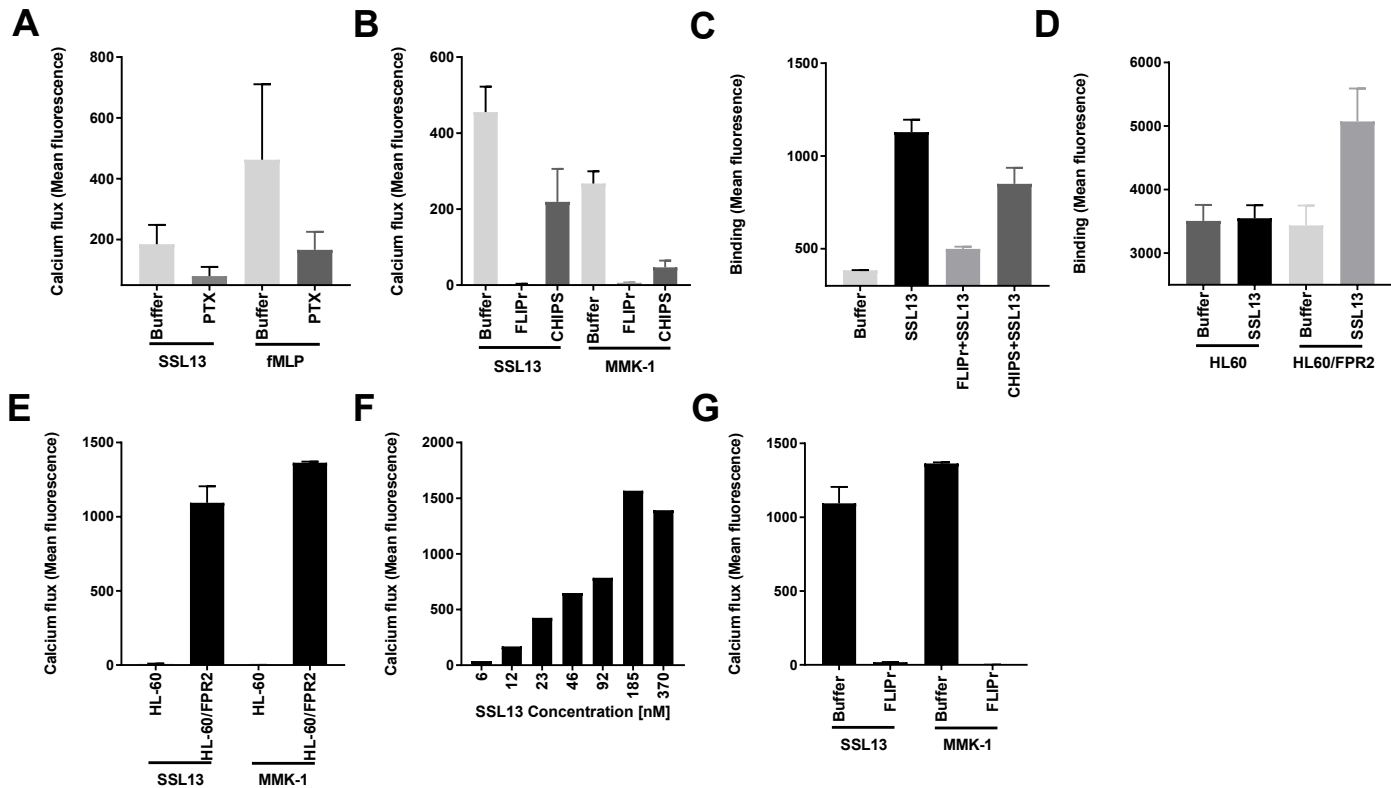

**Fig 3. SSL13 specifically binds and activates human Formyl Peptide Receptor 2.** (A) Neutrophils were preincubated with or without 3  $\mu$ g/ml PTX for 60min at 37  $^{\circ}$ C with CO<sub>2</sub> and then labeled with Fluo-3 AM. Neutrophil stimulation by SSL13 is sensitive to PTX. fMLP is the control ligand of FPR1, which is also sensitive to PTX. (B) Human neutrophil stimulation by SSL13 is inhibited by FLIPr, not CHIPS. (C) SSL13 specific binding to human neutrophils is blocked by FLIPr, not CHIPS. Data represent means  $\pm$  SEM of three independent experiments. (D) SSL13 specifically binds to FPR2 transfected HL60 cells(HL60/FPR2), but not to control HL60 cells. (E) SSL13 induces profound calcium fluxes in HL60/FPR2 cells, but not in empty HL60 cells. MMK-1 is a synthetic control ligand of FPR2. (F) HL60/FPR2 cells stimulation by SSL13 is concentration dependent. (G) HL60/FPR2 cells stimulation by SSL13 is sensitive to FPR2-specific inhibitor FLIPr. Data are mean fluorescence  $\pm$  SEM of three experiments.

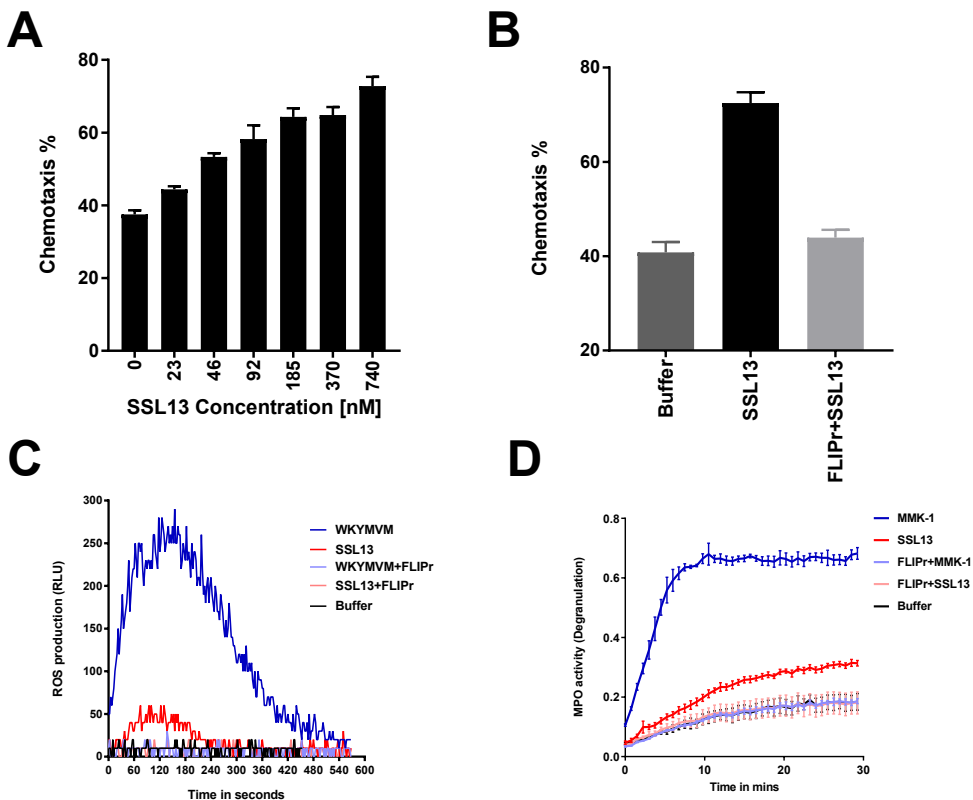

**Fig 4. SSL13 is involved in chemoattractant induced oxidative burst and degranulation of neutrophils.** (A) SSL13 stimulates chemotaxis in human neutrophils in a dose dependent manner. (B) SSL13-induced chemotaxis of human neutrophils is inhibited by the FPR2 antagonist FLIPr. (C) SSL13 stimulates FPR2 induced oxidative burst. WKYMVM is a synthetic control ligand of FPR2. (D) SSL13 modestly induces neutrophil degranulation via FPR2. MMK-1 is a positive control. (A and B) data represent means  $\pm$  SEM of three experiments. (C and D) data from a representative experiment.

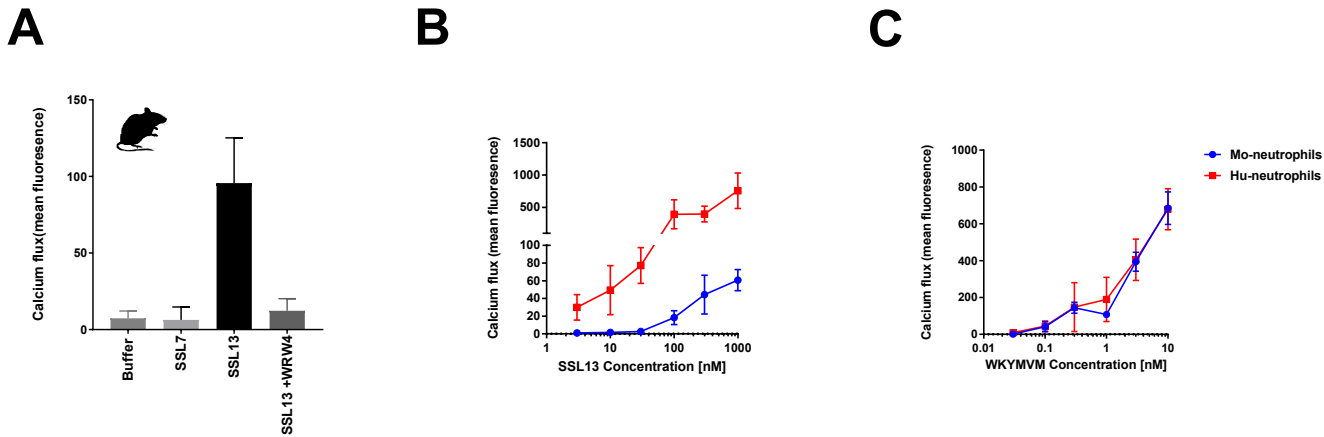

**Fig 5. SSL13 is not able to efficiently activate mouse neutrophils.** (A) SSL13 can induce activation of murine neutrophils, which can be inhibited by the mFPR2 antagonist WRW4. (B) SSL13-induced calcium fluxes in murine neutrophils are low compared to human neutrophils. (C) WKYMVM-induced calcium fluxes in murine neutrophils are similar to human neutrophils. Data are mean fluorescence  $\pm$  SEM of three experiments.

**Table S1. Primers for genome sequencing**

|               | primers                                                                                                 |
|---------------|---------------------------------------------------------------------------------------------------------|
| pDJ01NextN701 | CAAGCAGAAGACGGCATAACGAGATTCGCCTTAGTCTCGTGGGCTCGGAGAT<br>GTGTATAAGAGACAGCAGGACAATCCTGAACGCAGAAATCAAGAGG  |
| pDJ01NextN702 | CAAGCAGAAGACGGCATAACGAGATCTAGTACGGTCTCGTGGGCTCGGAGA<br>TGTGTATAAGAGACAGCAGGACAATCCTGAACGCAGAAATCAAGAGG  |
| pDJ01NextN501 | AATGATACGGCGACCACCGAGATCTACACTAGATCGCTCGTCGGCAGCGTC<br>AGATGTGTATAAGAGACAGCAAAATCACCGGAACCAGAGCCACCACCC |
| pDJ01NextN502 | AATGATACGGCGACCACCGAGATCTACACCTCTCTATTCGTCGGCAGCGTC<br>AGATGTGTATAAGAGACAGCAAAATCACCGGAACCAGAGCCACCACCC |

**Table S2. Proteins with the highest read frequency after phage display selection**

| <b>Identified Protein</b>                                                         | <b>read freq.</b> | <b># of clones</b> | <b>Protein function</b>                       |
|-----------------------------------------------------------------------------------|-------------------|--------------------|-----------------------------------------------|
| PTS mannitol transporter subunit IICB                                             | 883               | 7                  |                                               |
| Peroxidase Inhibitor                                                              | 196               | 4                  | Inhibits human neutrophil myeloperoxidase     |
| NWMN_0791 conserved hypothetical protein (HlyC/CorC family transporter)           | 109               | 4                  | Conserved hypothetical protein                |
| Immunoglobulin G-binding protein Sbi                                              | 101               | 2                  | Inhibits opsonophagocytosis                   |
| Iron ABC transporter                                                              | 79                | 2                  |                                               |
| Superantigen-like protein SSL4                                                    | 72                | 7                  | Binds sialated glycoproteins on myeloid cells |
| Acetyl-CoA acetyltransferase                                                      | 54                | 3                  |                                               |
| Methicillin resistance protein FmtB                                               | 50                | 3                  |                                               |
| TIGR01440 family protein                                                          | 47                | 1                  | Conserved hypothetical protein                |
| Chemotaxis Inhibitory Protein                                                     | 41                | 2                  | Inhibits C5aR and FPR1 mediated chemotaxis    |
| Mannitol transporter protein                                                      | 39                | 1                  |                                               |
| Meticillin resistance cassette                                                    | 39                | 4                  |                                               |
| FPR2 inhibitory protein                                                           | 36                | 2                  | Inhibits FPR2 on neutrophils and monocytes    |
| Cell wall associated fibronectin-binding protein                                  | 48                | 3                  | Binds plasminogen and elastin                 |
| N-acetylmuramoyl-L-alanine amidase                                                | 26                | 3                  |                                               |
| Ribosomal RNA methyltransferase FmrO domain protein                               | 25                | 1                  |                                               |
| CBS domain protein                                                                | 24                | 1                  |                                               |
| Dihydroorotase                                                                    | 19                | 1                  |                                               |
| DUF4064 domain-containing protein                                                 | 19                | 1                  |                                               |
| ATP-dependent Clp protease, ATP-binding subunit ClpC                              | 16                | 1                  |                                               |
| Non-coding region between hypothetical proteins                                   | 16                | 1                  |                                               |
| NWMN_0280 conserved hypothetical protein similar to ORF061 of Bacteriophage ROSA  | 15                | 1                  | Conserved hypothetical protein                |
| Aldehyde dehydrogenase family protein                                             | 14                | 1                  |                                               |
| Capsular polysaccharide biosynthesis protein CapJ                                 | 14                | 1                  |                                               |
| Conserved hypothetical protein (downstream LukED)                                 | 14                | 1                  | Conserved hypothetical protein                |
| NWMN_2283 hypothetical protein DUF4889 superfamily(upstream conserved hypot 2282) | 14                | 1                  |                                               |
| Fibronectin binding protein                                                       | 13                | 1                  | Binds plasminogen and elastin                 |
| Intergenic region between BAF68719.1 en BAF68720.1                                | 13                | 1                  |                                               |

|                                                                                                                                                                       |    |   |                                                         |
|-----------------------------------------------------------------------------------------------------------------------------------------------------------------------|----|---|---------------------------------------------------------|
| Phage anti-repressor for bacteriophage phiNM1                                                                                                                         | 13 | 1 |                                                         |
| Branched-chain amino acid transporter II carrier protein                                                                                                              | 12 | 1 |                                                         |
| Conserved hypothetical protein similar to 5'-nucleotidase family protein multifunctional 2',3'-cyclic-nucleotide 2'-phosphodiesterase/5'-nucleotidase/3'-nucleotidase | 12 | 1 | Conserved hypothetical protein                          |
| Enterobactin ABC transporter permease                                                                                                                                 | 12 | 1 |                                                         |
| LLM class flavin-dependent oxidoreductase                                                                                                                             | 12 | 1 |                                                         |
| Multidrug resistance transporter protein B                                                                                                                            | 12 | 1 |                                                         |
| NWMN_2018 conserved hypothetical protein                                                                                                                              | 12 | 1 | Conserved hypothetical protein                          |
| Staphyloxanthin biosynthesis protein                                                                                                                                  | 12 | 1 | Inhibits oxygen radicals                                |
| Bi-component leukocidin LukGH subunit H                                                                                                                               | 11 | 1 | Leukotoxin                                              |
| Clumping factor A                                                                                                                                                     | 11 | 1 | Binds fibrinogen                                        |
| Cysteine protease staphopain B                                                                                                                                        | 11 | 1 | Inactivates neutrophil elastase and complement proteins |
| NWMN_0338 conserved hypothetical protein                                                                                                                              | 11 | 1 | Conserved hypothetical protein                          |
| Monovalent cation/H <sup>+</sup> antiporter subunit D                                                                                                                 | 10 | 1 |                                                         |
| Na <sup>+</sup> /alanine symporter family protein                                                                                                                     | 10 | 1 |                                                         |
| NWMN_0344 conserved hypothetical protein (ABC-2 transporter permease)                                                                                                 | 10 | 1 | Conserved hypothetical protein                          |
| Bi-component gamma-hemolysin HlgAB subunit A                                                                                                                          | 9  | 1 | Leukotoxin                                              |
| Iron-regulated heme-iron binding protein IsdB                                                                                                                         | 9  | 1 |                                                         |
| Lantibiotic leader peptide processing serine protease                                                                                                                 | 9  | 1 |                                                         |
| Minor structural protein for bacteriophage phiNM3                                                                                                                     | 9  | 1 |                                                         |
| NWMN_0218 staphyloxanthin biosynthesis protein                                                                                                                        | 9  | 1 |                                                         |
| NWMN_1584 conserved hypothetical protein                                                                                                                              | 9  | 1 | Conserved hypothetical protein                          |
| Peptidase M23B                                                                                                                                                        | 9  | 1 |                                                         |
| Secretory antigen precursor SsaA homolog                                                                                                                              | 9  | 1 |                                                         |
| Superantigen-like protein SSL13                                                                                                                                       | 9  | 1 | Activates FPR2 on neutrophils and monocytes             |
| 16S rRNA methyltransferase                                                                                                                                            | 8  | 1 |                                                         |
| Manganese ABC transporter substrate-binding protein                                                                                                                   | 8  | 1 |                                                         |
| MarR family transcriptional regulator                                                                                                                                 | 8  | 1 |                                                         |
| Multifunctional 2',3'-cyclic-nucleotide 2'-phosphodiesterase/5'-nucleotidase/3'-nucleotidase                                                                          | 8  | 1 |                                                         |
| rRNA-23S ribosomal RNA                                                                                                                                                | 8  | 1 |                                                         |
| Truncated transposase for IS1272                                                                                                                                      | 8  | 1 |                                                         |
| Truncated triacylglycerol lipase precursor                                                                                                                            | 8  | 1 |                                                         |



**Table S2. Proteins with the highest read frequency after phage display selection.** A *Staphylococcus aureus* phage display library was selected for binding against isolated human neutrophils. The selected library was analyzed by whole genome sequencing. Table shows the top hits after selection based on read frequency and grouped by number of different clones. Function of previously characterized immune evasion proteins and hypothetical proteins are listed.
